# Supplementary material for: Bacteriophages Combined with Hybridized Nanoflower-based Electrochemical Biosensor for the Specific and Rapid Detection of Live Acinetobacter baumannii in Real Samples
Source: Research Square preprint supplement (doi:10.21203/rs.3.rs-7324937/v1), 2025-08-21
Supplement: Supplementary file 1 [file 7fe16f1de2af6a9d39007252.docx]

**Supporting Information (SI)**

**Bacteriophages Combined with Hybridized Nanoflower-based Electrochemical Biosensor for the Specific and Rapid Detection of Live *Acinetobacter baumannii* in Real Samples**

Huan Wang 1, a, [Wajid Hussain](javascript:void(0)) 1, a, Xiaohan Yang 1, Yanming Chen 2, Tong Hu 1, Wei Chen 1, Shenqi Wang 1, *

1 Advanced Biomaterials and Tissue Engineering Center,College of Life Science and Technology, Huazhong University of Science and Technology, Wuhan 430074, PR China

2 University-Affiliated Hospital, Huazhong University of Science and Technology, Wuhan 430074, PR China

a These authors contributed equally to this work and should be considered co-first authors.

*Corresponding author:

Shenqi Wang:[shenqiwang131@hust.edu.cn](mailto:shenqiwang131@hust.edu.cn)

1. ***Chemicals and Instrumentations***

Copper sulfate pentahydrate (CuSO4·5H2O) and trisodium citrate were purchased from Sinopharm Chemical Co. Ltd. (Shanghai, China). Tetrachloroauric acid trihydrate (HAuCl4·3H2O) and 30% hydrogen peroxide (H2O2) were purchased from Aladdin Chemistry Co., Ltd. (Shanghai, China). 3, 3', 5, 5'-Tetramethylbenzidine (TMB) was purchased from Macklin Biochemical Co. Ltd. (Shanghai, China), and c-MWCNTs were purchased from Xian Feng Nanomaterials Technology Co. Ltd. (Nanjing, China). The horseradish peroxidase (HRP) lyophilized powder (salt-free) was purchased from SolarBio (Beijing, China). All chemical reagents were of analytical grade and were used without any modifications. All the experiments were performed using ultrapure water (18.25 MΩ•cm).

Plasma was provided by Shiyan People's Hospital(Shiyan, Hubei China), serum was purchased from Solarbio Co., Ltd. (Beijing, China), and saline was purchased from Kelun Pharmaceutical Co., Ltd. (Chengdu, China). The hospital wastewater is sourced from the university Hospital of Huazhong University of Science and Technology and undergoes disinfection and sterilization treatment.

The chemical formation of the nanoflowers was characterized by Fourier transform infrared (FT-IR) spectroscopy using a Fourier-transform infrared spectrometer (NICOLET, iS50R, Thermo, USA). Scanning electron microscopy (SEM, NOVA Nano 450, FEI Corp.) and transmission electron microscopy (TEM, HT7700, HITACHI) were used to examine the morphology of the nanomaterials. X-ray diffraction (XRD) spectra were obtained to analyze the chemical structures of the nanoflowers using an X-ray diffractometer (Empyrean, PANalytical Corp., Netherlands). The absorbance was measured using a microplate reader (Eon, Biotek, USA). All electrochemical experiments were performed using a traditional three-electrode system (glass carbon electrode as the working electrode, Pt electrode as the counter electrode, and Ag/AgCl electrode as the reference electrode) on a CHI660E electrochemical workstation (Shanghai, Chenhua Instruments Co. Ltd., China). All bacterial cultivation experiments were conducted in a biosafety level 2 (BSL-2) laboratory following standard operating procedures and protocols.

***2. Experimental***

## Bacterial strains growth condition and purification of *A. baumannii* phage

Luria-Bertani (LB) medium was used to culture the *A. baumannii* bacteria, along with other bacterial strains including *Yersinia pseudotuberculosis*, *Staphylococcus aureus,* and *Pseudomonas aeruginosa,* at 37°C to the logarithmic growth phase (log phase). The bacteria were diluted in PBS to obtain different concentrations for further use.

Phages were isolated from wastewater and provided by other colleagues in our research group. The *A. baumanii*-specific phages were amplified by culturing them in an *A. baumannii* suspension at log phase in LB liquid media with MOI (Multiplicity of Infection) of 0.1 and then incubating the mixture for 6 h (37℃,110 rpm). Following centrifugation, the resulting supernatant was separated and filtered through a 0.22 μm filter membrane to remove bacteria. Next, the supernatant was centrifuged at ultra-high speed (35000 xg, 1 h), and the resulting precipitate was suspended in PBS to obtain high-titer phages. The concentration of the amplified phage was determined using the double agar plate method and expressed as PFU/mL.

## One-step growth curve of the specific phage

To investigate the course of phage-induced lysis in bacterial cells, one-step growth curve of the phage was conducted. Briefly, 10 mL of log-stage *A. baumanii* was mixed with 1mL of phage (106 PFU/mL) and allowed to absorb for 5 min at 37℃. The mixture was then centrifuged, resuspended in 50 mL LB medium, and incubated at 37℃ with shaking at 110 rpm. The phage titers were measured at regular intervals to track the progress of lysis.

## Synthesis of gold nanoparticles (AuNPs)

AuNPs were prepared following a previously reported approach with slight modifications[[1](#_ENREF_1)][[1](#_ENREF_1)][[1](#_ENREF_1)]. Trisodium citrate (2 ml, 1%) was quickly added to the boiling HAuCl4·3H2O solution (50 mL, 0.1%) under constant stirring, and the solution exhibited a noticeable color change from transparent to yellow to burgundy. After heating for 15 mins, the AuNPs were collected and stored at 4°C in the dark.


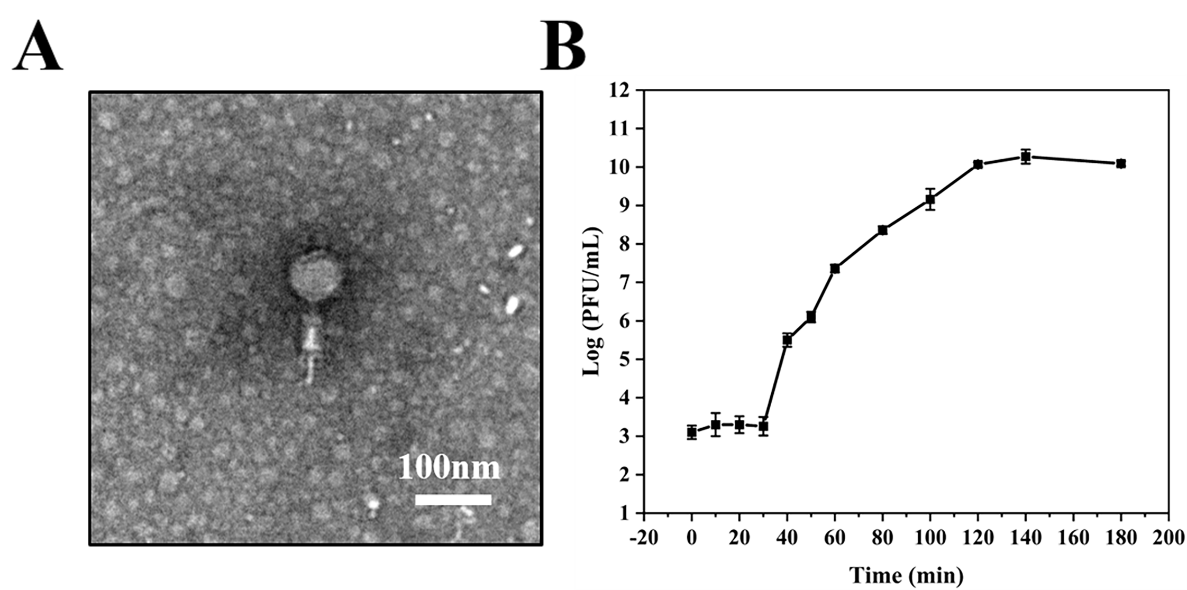


**Fig. S1** Characterization of the phage **A)** TEM images of the phage. **B)** One-step growth curve of the phage.


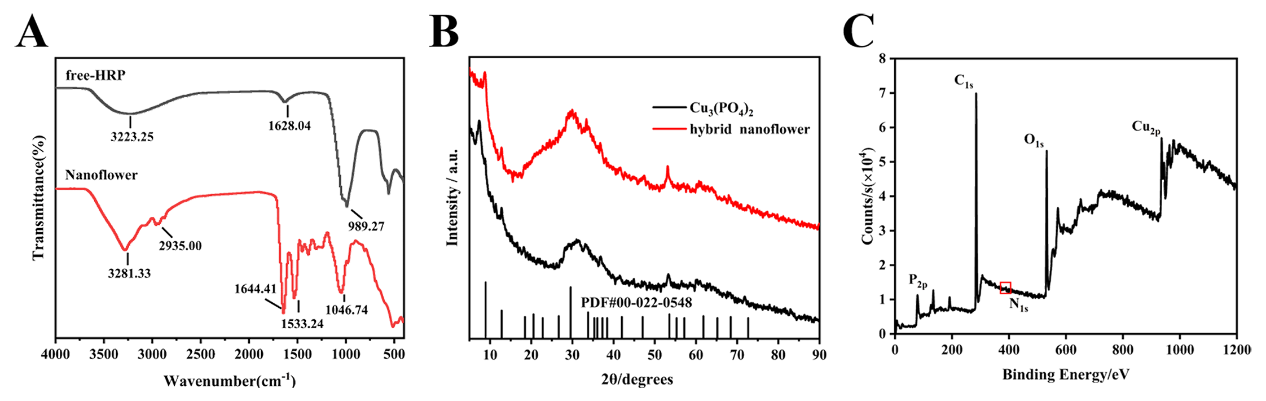


**Fig. S2** Characterization of hybrid nanoflowers. **A)** FTIR spectrum of the hybrid nanoflowers and HRP. **B)** XRD pattern of the hybrid nanoflowers and Cu3(PO4)2.**C)** XPS spectra of hybrid nanoflowers.


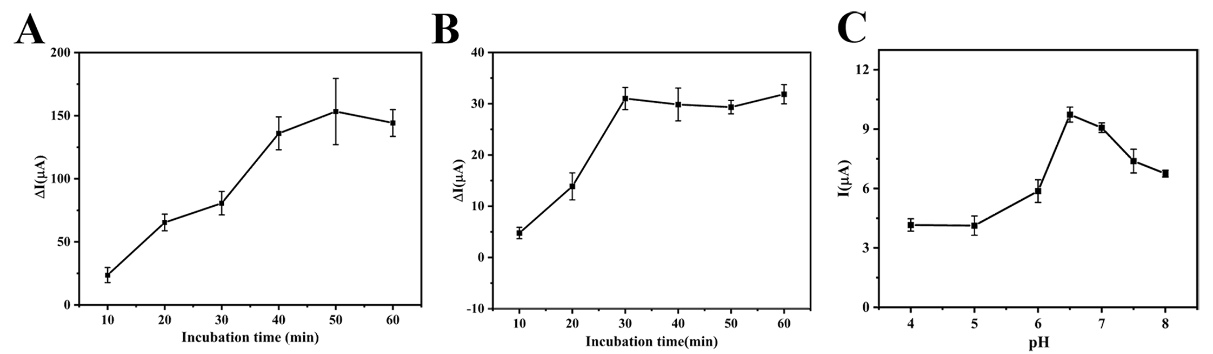


**Fig. S3** Optimization of the electrochemical detection parameters. A) Incubation time of NF&phages. B) Incubation time for bacteria. C) pH of 10 mM H2O2 electrolyte (n=3).


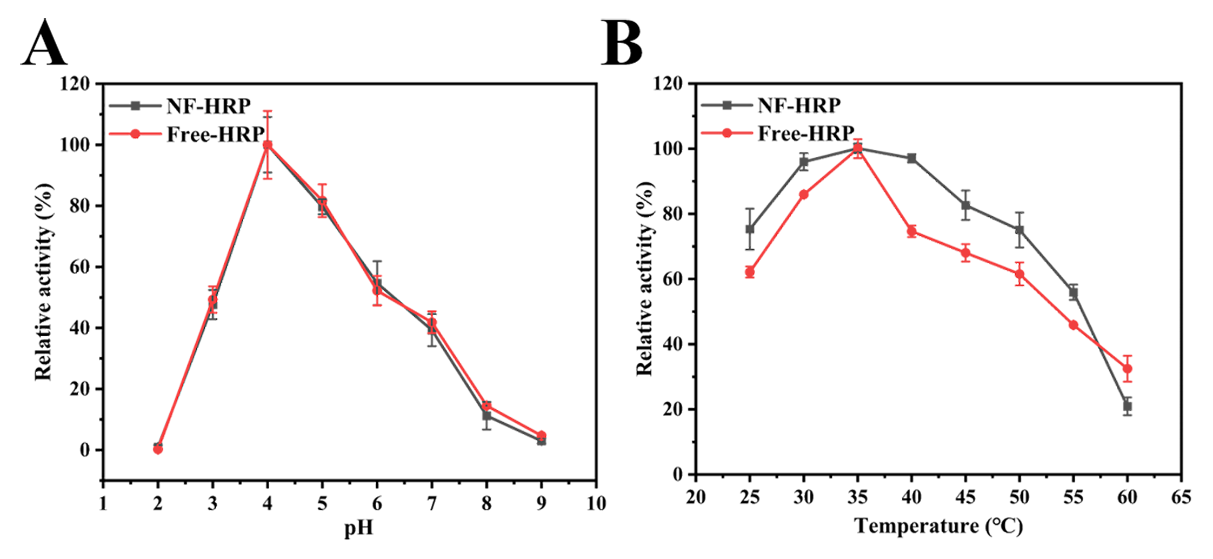


**Fig. S4** Properties of enzymatic reactions. A) Optimal pH for the enzymatic reactions. B) Optimal temperature for the enzymatic reaction (n=3).

**Table S1.** Detection results of practical samples using the phage-based biosensor

| **Sample** | **Bacteria (CFU/mL)** | **Detection Results (CFU/mL)** | **Recovery rate (%)** | **SD （N=3, %）** |
| --- | --- | --- | --- | --- |
| Serum | 7.5×103 | 6.97×103 | 92.93 | 12.58 |
| Serum | 7.5×104 | 7.37×104 | 98.27 | 24.38 |
| Saline | 1.75×104 | 1.92×104 | 109.71 | 13.85 |
| Saline | 1.75×105 | 1.96×105 | 112.00 | 27.18 |
| Plasma | 3.58×103 | 3.65×103 | 101.96 | 11.61 |
| Plasma | 3.58×104 | 3.35×104 | 93.57 | 26.39 |

Note: Recovery rate is expressed as the ratio of the number of detected to the number of spiked.

**Table S2.**  The enzyme kinetic parameters of free-HRP and NF-HRP reactions

| **Enzyme** | **Substrate** | **Km (mM)** | **Vmax（10-8M s-1）** | **R2** |
| --- | --- | --- | --- | --- |
| Free-HRP | H2O2 | 2.00222 | 7.12626 | 0.98027 |
| NF-HRP | H2O2 | 0.98595 | 7.93844 | 0.96135 |

Note: Km: the enzyme affinity for binding to the substrate, defined as the substrate concentration at which the enzymatic reaction rate reaches half of Vmax. Vmax: the maximum rate when the substrate concentration is at saturation level.

References

[1] Ji, X., Song, X., Li, J., Bai, Y., Yang, W., Peng, X., (2007) Size Control of Gold Nanocrystals in Citrate Reduction: The Third Role of Citrate. Journal of the American Chemical Society 129, 13939-13948.<https://doi.org/10.1021/ja074447k>
